# Supplementary material for: Is the effect of surface modifying molecules on antibacterial activity universal for a given material?
Source: Royal Society of Chemistry journal article supplement (doi:10.1039/c4nr02366h), 2014-01-01
Supplement: c4nr02366h1.pdf [file c4nr02366h1.pdf]

## Supplementary Information

# Is the effect of surface modifying molecules on antibacterial activity universal for a given material?

*Alexander Hsu,<sup>a</sup> Fangzhou Liu,<sup>a</sup> Yu Hang Leung,<sup>a</sup> Angel P. Y. Ma,<sup>b</sup> Aleksandra B. Djurišić,<sup>\*a</sup>  
Frederick C. C. Leung,<sup>b</sup> Wai Kin Chan,<sup>c</sup> Hung Kay Lee<sup>d</sup>*

<sup>a</sup>Department of Physics, University of Hong Kong, Pokfulam Road, Hong Kong.

<sup>b</sup>School of Biological Sciences, University of Hong Kong, Pokfulam Road, Hong Kong.

<sup>c</sup>Department of Chemistry, University of Hong Kong, Pokfulam Road, Hong Kong.

<sup>d</sup>Department of Chemistry, Chinese University of Hong Kong, Shatin, New Territories, Hong Kong.

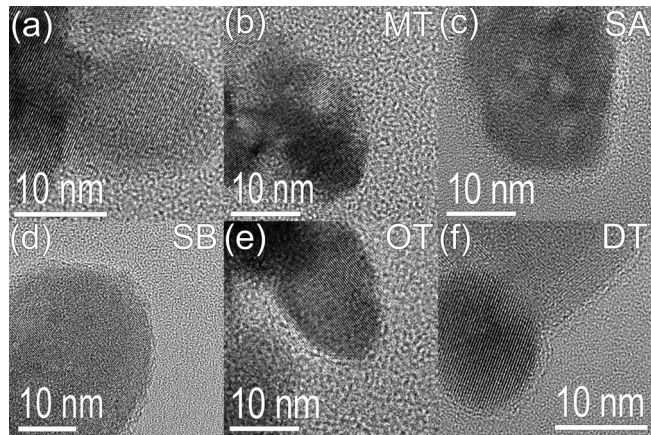

**Figure S1** TEM images of A-ZnO nanoparticles with different surface modifications: a) none b) MT, c) SA, d) SB, e) OT, f) DT.

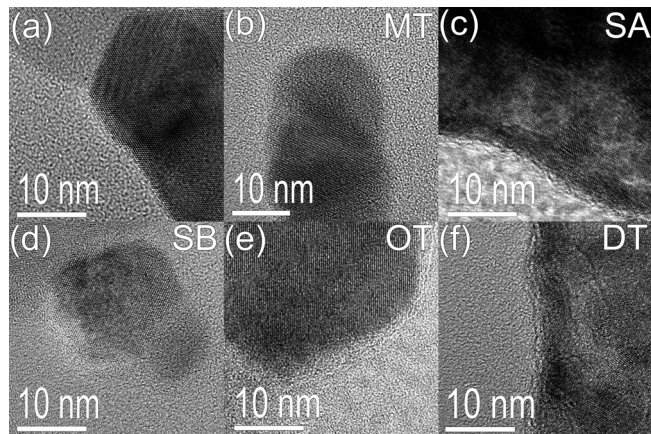

**Figure S2** TEM images of B-ZnO nanoparticles with different surface modifications: a) none b) MT, c) SA, d) SB, e) OT, f) DT.

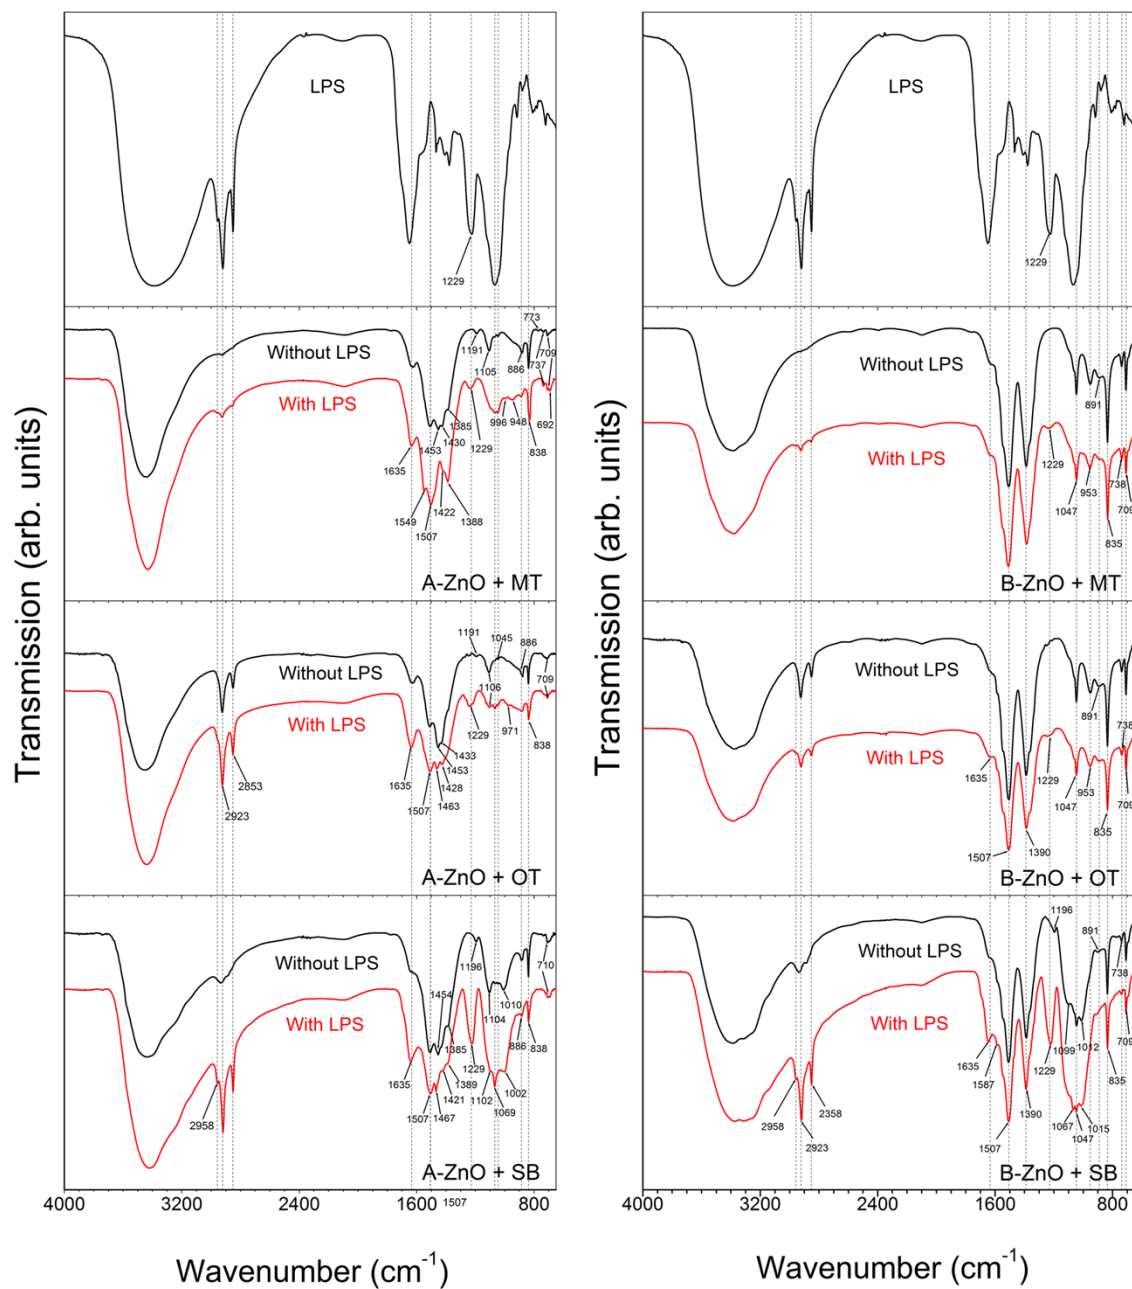

**Figure S3** FTIR spectra of ZnO nanoparticles before and after exposure to LPS. A-ZnO samples are on the left, B-ZnO on the right, and the FTIR spectra of pure LPS are also shown for comparison.
